# Supplementary material for: Design of an efficient photocatalyst: a type II heterojunction for enhanced hydrogen production driven by visible light
Source: Royal Society of Chemistry journal article supplement (doi:10.1039/d1cp00347j), 2021-01-01
Supplement: d1cp00347j1.pdf [file d1cp00347j1.pdf]

## Design of an Efficient Photocatalyst: Type II Heterojunction for Enhanced Hydrogen Production Driven by Visible Light

Jin Feng,<sup>†</sup> Mengdi Cui,<sup>†</sup> Huining Liu,<sup>†</sup> Fengjie Zhou,<sup>†</sup> Siwei Bi,<sup>\*†</sup> Dapeng Zhang<sup>\*†</sup>

<sup>†</sup> School of Chemistry and Chemical Engineering, Qufu Normal University, Qufu 273165,  
China

\*Corresponding author: Dapeng Zhang; Siwei Bi.

E-mail: zdp1014636837@hotmail.com; siweibi@126.com.

## Table of Contents

- Free Energy Calculation

-**Figure S1.** The structures of porphyrins.

-**Figure S2.** Views of Mg-chl/g-C<sub>3</sub>N<sub>4</sub>.

-**Figure S3.** Convergence debugging of parameter in GW and BSE.

-**Figure S4.** The searching process of the best structure for porphyrin/g-C<sub>3</sub>N<sub>4</sub>.

-**Figure S5.** The band structure and orbital distribution of Mg-chl/g-C<sub>3</sub>N<sub>4</sub>.

-**Figure S6.** The band structure and orbital distribution of H-chl/g-C<sub>3</sub>N<sub>4</sub>.

-**Figure S7.** The band structure and orbital distribution of H-por/g-C<sub>3</sub>N<sub>4</sub>.

-**Figure S8.** The band structure and orbital distribution of Mg-por/g-C<sub>3</sub>N<sub>4</sub>.

-**Figure S9.** The configurations for H<sub>2</sub>O absorbing on porphyrins.

-**Table S1.** The dissociation energies (eV) for the •H.

-**Figure S10.** Structures of the reaction intermediates of H<sub>2</sub>O on pure g-C<sub>3</sub>N<sub>4</sub>.

-**Figure S11.** Structures of the reaction intermediates of H<sub>2</sub>O on Mg-por/g-C<sub>3</sub>N<sub>4</sub>.

## Free Energy Calculation

The process of oxygen evolution reaction (OER) is as following:

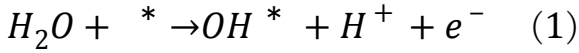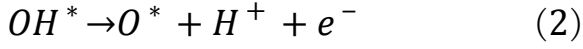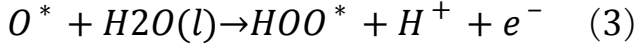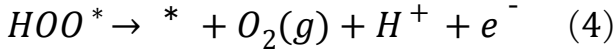

In computational hydrogen electrode (CHE) model<sup>1</sup>, the free energy of a proton-electron pair at 0V vs RHE is defined to be to  $\frac{1}{2}$  of the  $H_2$  free energy at 101,325 Pa, meaning that the Gibbs

free energy change ( $\Delta G$ ) is 0 for the reaction  $H_{(aq)}^+ + e^- \rightleftharpoons \frac{1}{2}H_{2(g)}$ . Therefore, the  $\Delta G$  for each elemental step is

$$\Delta G_1 = G_{HO^*} + \frac{1}{2}G_{H_2} - G_* - G_{H_2O}$$

$$\Delta G_2 = G_{O^*} + \frac{1}{2}G_{H_2} - G_{OH^*}$$

$$\Delta G_3 = G_{HOO^*} + \frac{1}{2}G_{H_2} - G_{O^*} - G_{H_2O}$$

$$\Delta G_4 = 4.92 - [\Delta G_1 + \Delta G_2 + \Delta G_3]$$

The Gibbs free energy is calculated using

$$G = E + ZPE - TS + eU$$

where  $E$  is the energy of optimized structure;  $e$  and  $U$  are the number of electrons transferred and the electrode potential applied; the zero point energies (ZPE) and enthalpic entropy correction (TS) were obtained as  $G(T)$  using Vaspkit.<sup>2</sup>

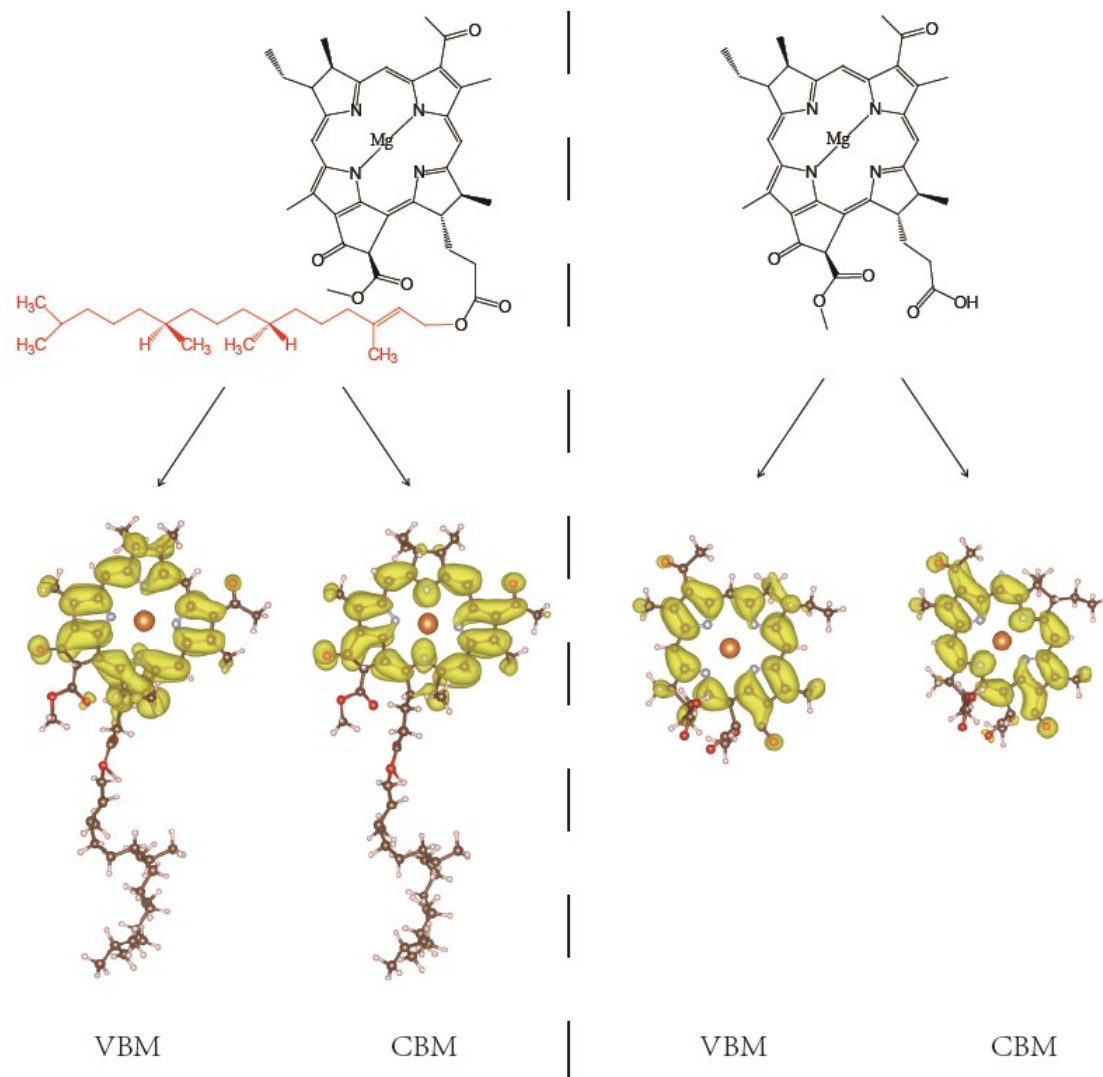

**Figure S1.** The structures and orbital distributions of chlorophyll (left) and simplified chlorophyll (right).

In our study, the reasons why phytyl chain longer than 10 Å shown in red in left of Figure S1 can be replaced by H are as follows: first, the frontier orbitals of Mg-chl which determines the type of heterojunction Mg-chl/g-C<sub>3</sub>N<sub>4</sub> are fixed on the porphyrin structure, not the phytyl chain; second, the distance between the red phytyl chain and g-C<sub>3</sub>N<sub>4</sub> is more than 12 Å resulting weak interaction between them.

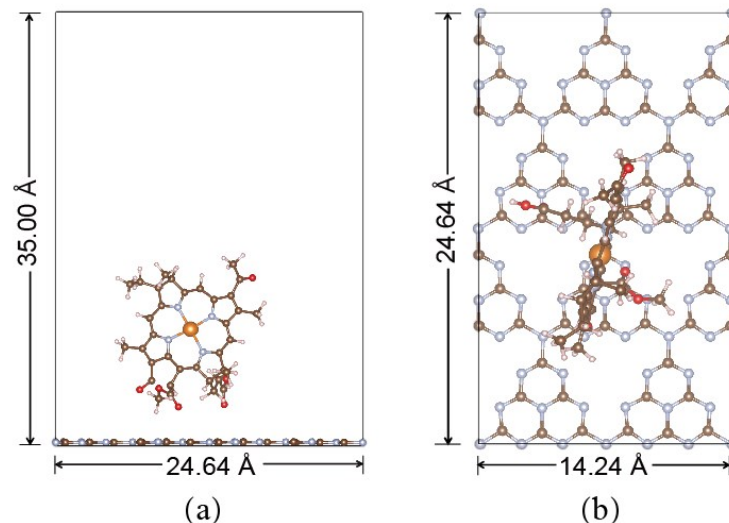

**Figure S2** Side view (left) and top view (right) of Mg-chl/g-C<sub>3</sub>N<sub>4</sub>.

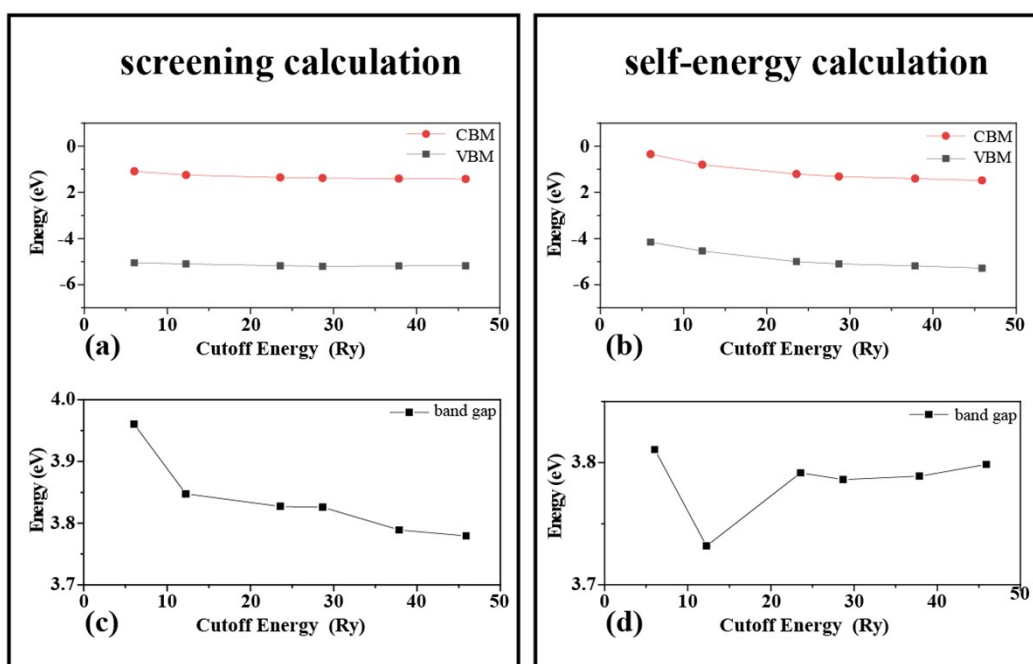

**Figure S3** Calculated GW VBM and CBM energies of perfect g-C<sub>3</sub>N<sub>4</sub> versus cutoff energy of unoccupied orbitals in the screening calculation(a) and self-energy calculation (c), while the band gaps shown in (c) and (d). The cutoff energy is relative to the CBM energy.

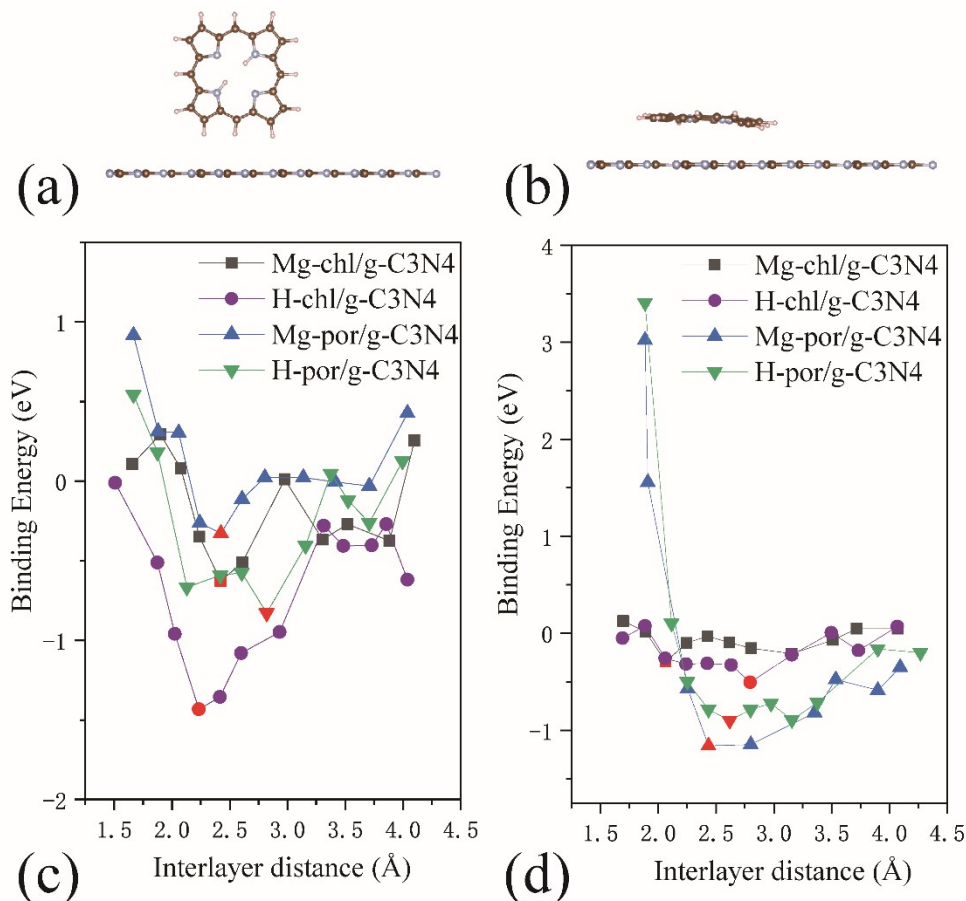

**Figure S4.** Two configurations of porphyrin relative to CN, vertical and parallel, are shown in (a) and (b). Binding energies of four porphyrins on the g-C<sub>3</sub>N<sub>4</sub> monolayer for vertical (a) and parallel (b) configurations as a function of the distance between porphyrins and g-C<sub>3</sub>N<sub>4</sub> are shown in (c) and (d). The optimal distance for each configuration is marked in red in (c) and (d).

The interlayer distance between porphyrin and g-C<sub>3</sub>N<sub>4</sub> is the difference of between the maximum value of g-C<sub>3</sub>N<sub>4</sub> in Z direction and the minimum value of porphyrin in Z direction. We set up several random stacking patterns by hand with interlayer distance  $\sim 3$  Å when porphyrin is perpendicular or parallel to g-C<sub>3</sub>N<sub>4</sub> (the configurations are shown in Figure S2(a) and S2(b)), then the interlayer distances from 1.5 to 4.3 Å of the most stable pattern are tested to find the stable configuration. We think that stacking pattern would influence little the electronic properties due to the long-range weak dispersion interaction between porphyrin and g-C<sub>3</sub>N<sub>4</sub>.

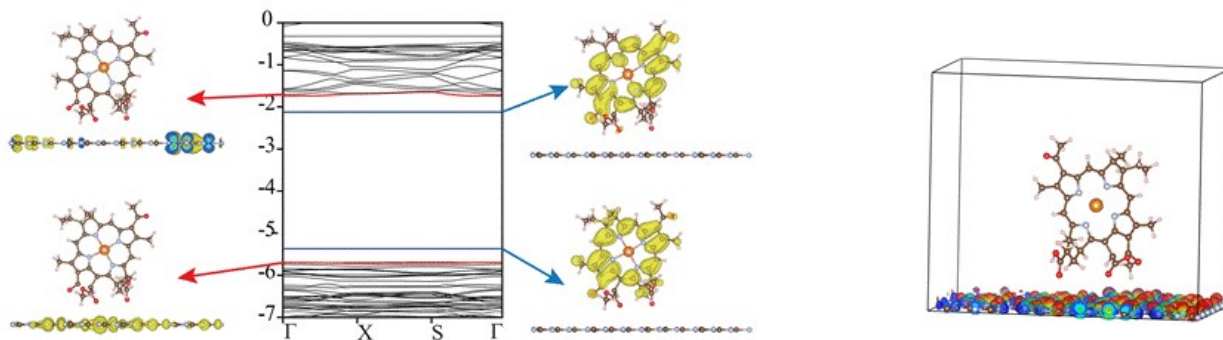

**Figure S5** The left is band structure and orbital distribution of Mg-chl/g-C<sub>3</sub>N<sub>4</sub>, where the VBM and CBM of porphyrin (g-C<sub>3</sub>N<sub>4</sub>) are marked in blue (red). The right is the distribution of the electron (red) and hole (blue) for the first excited state.

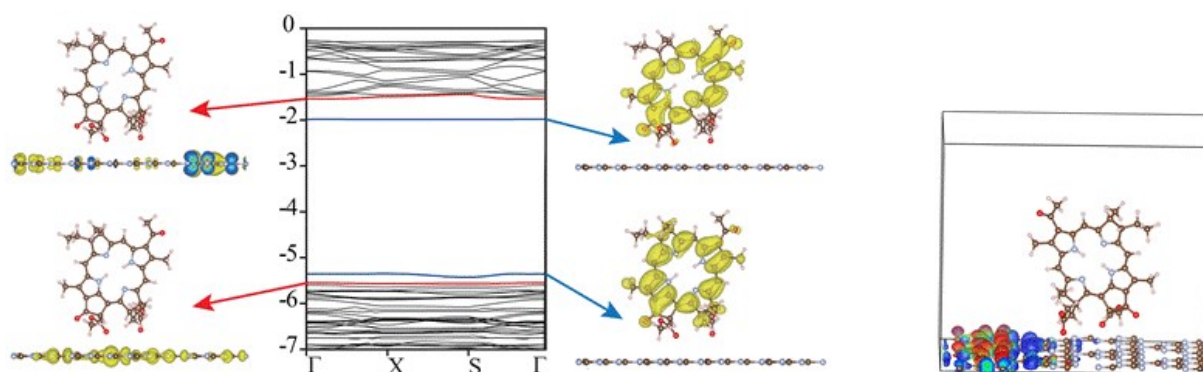

**Figure S6** The band structure and orbital distribution of H-chl/g-C<sub>3</sub>N<sub>4</sub>, where the VBM and CBM of porphyrin (g-C<sub>3</sub>N<sub>4</sub>) are marked in blue (red).

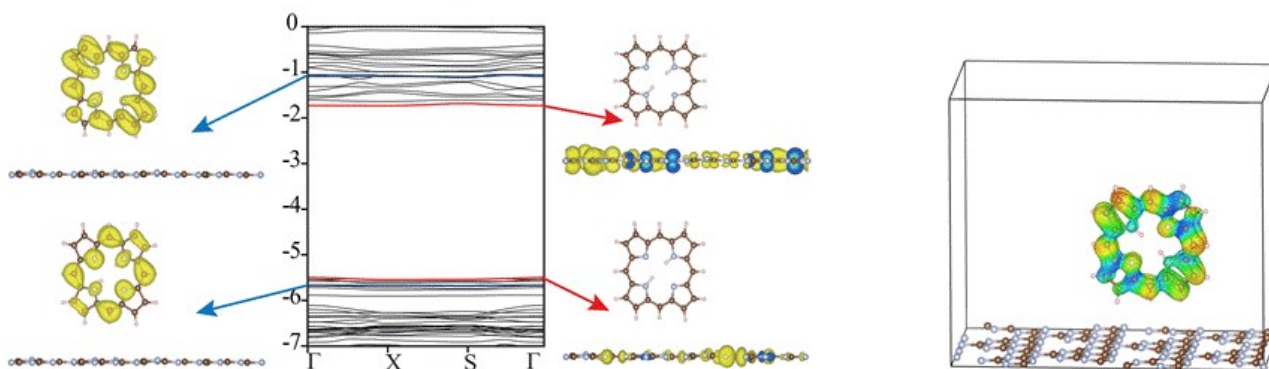

**Figure S7** The left is band structure and orbital distribution of H-por/g-C<sub>3</sub>N<sub>4</sub>, where the VBM and CBM of porphyrin (g-C<sub>3</sub>N<sub>4</sub>) are marked in blue (red). The right is the distribution of the electron (red) and hole (blue) for the first excited state.

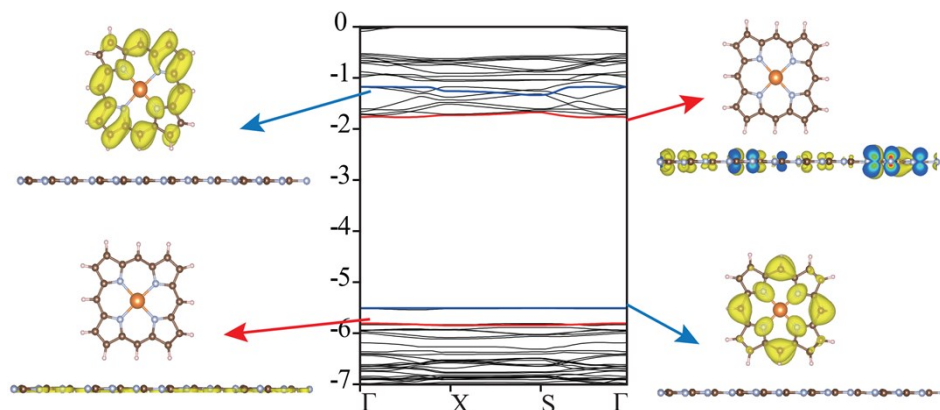

**Figure S8** The band structure and orbital distribution of Mg-por/g-C<sub>3</sub>N<sub>4</sub>, where the VBM and CBM of porphyrin (g-C<sub>3</sub>N<sub>4</sub>) are marked in blue (red).

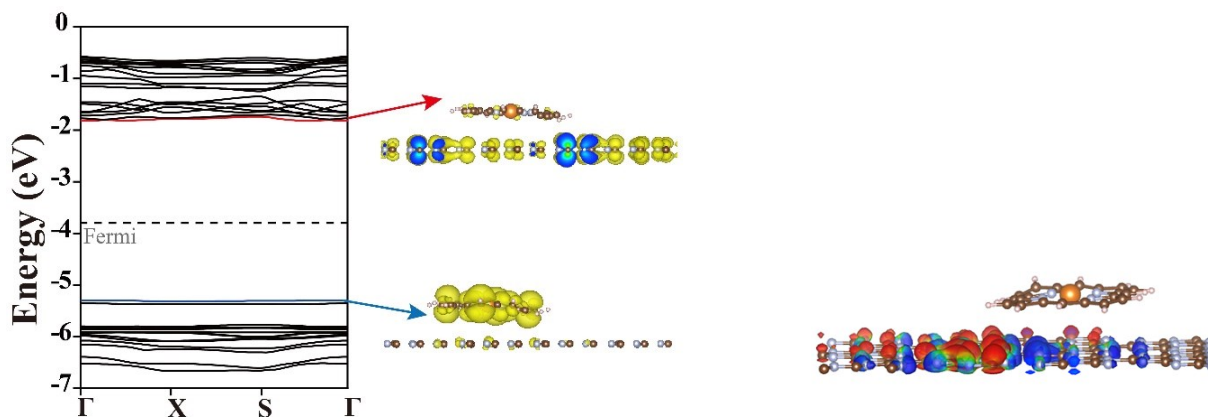

**Figure S9** The left is band structure and orbital distribution of Mg-por/g-C<sub>3</sub>N<sub>4</sub>, where the VBM and CBM of porphyrin (g-C<sub>3</sub>N<sub>4</sub>) are marked in blue (red). The vacuum energies (Ev) of all materials are set to 0. The fermi level is marked with black dotted line. The right is the distribution of the electron (red) and hole (blue) for the first excited state.

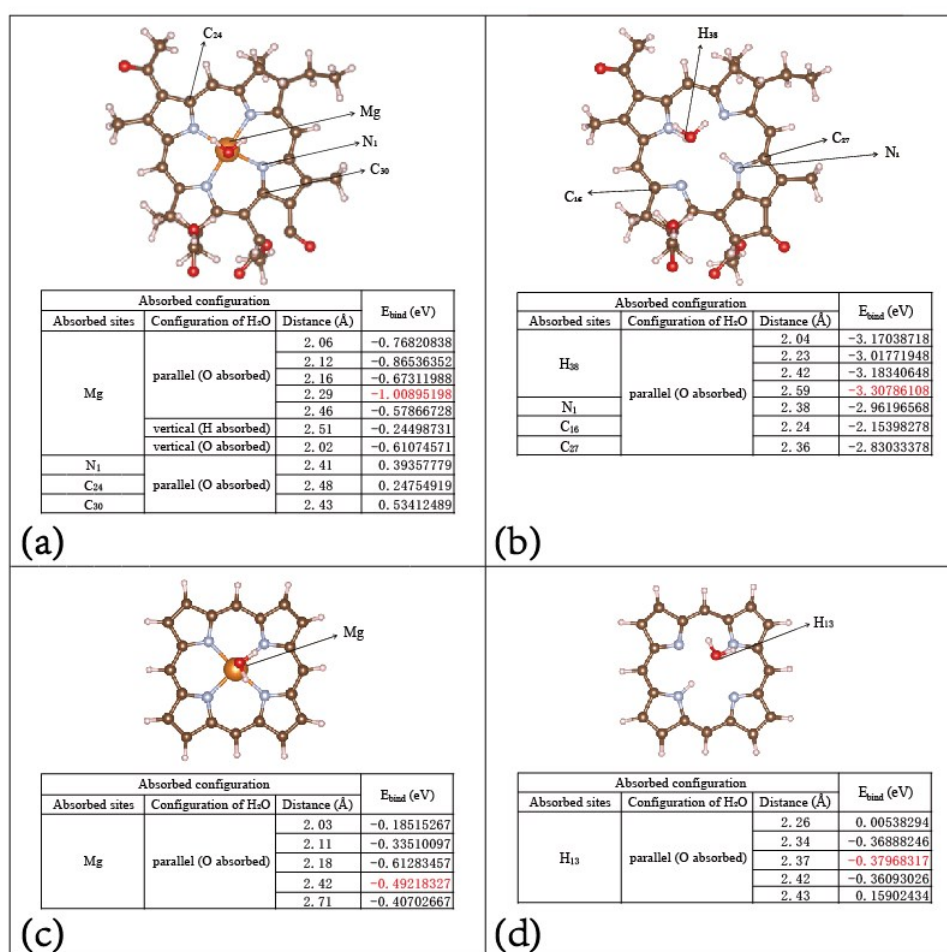

**Figure S10** The configurations and binding energies for H<sub>2</sub>O absorbing on Mg-chl (a), H-chl (b), Mg-por (c) and H-por (d). The absorbed sites include Mg, N and H atoms. The initial configurations of H<sub>2</sub>O are divided into three types: the first is that H<sub>2</sub>O is parallel to porphyrin with O atom absorbing on it; the second is that H<sub>2</sub>O is perpendicular to porphyrin with its H atom absorbing on it; the third is that H<sub>2</sub>O is perpendicular to porphyrin with its H atom absorbing on it. The binding energy is the optimal energy difference between the individual H<sub>2</sub>O plus porphyrin and the H<sub>2</sub>O/porphyrin.



| $\bullet\text{H}\cdot\text{OH}$ | $\text{H}_2\text{O}$ | $\text{H}_2\text{O}+\text{Mg-chl}^n$ | $\text{H}_2\text{O}+\text{H-chl}^n$ | $\text{H}_2\text{O}+\text{Mg-H}^n$ | $\text{H}_2\text{O}+\text{H-H}^n$ | $\text{H}_2\text{O}+\text{g-C}_3\text{N}_4$ |
|---------------------------------|----------------------|--------------------------------------|-------------------------------------|------------------------------------|-----------------------------------|---------------------------------------------|
| $\text{Ed}(n=0)$                | 5.49                 | 4.08                                 | 5.26                                | 4.62                               | 5.11                              | 4.98                                        |
| $\text{S}(n=0)$                 | $10^{-32}$           | $10^{-9}$                            | $10^{-29}$                          | $10^{-18}$                         | $10^{-26}$                        | $10^{-24}$                                  |
| $\text{Ed}(n=1^+)$              |                      | 4.45                                 | 5.63                                | 5.12                               | 5.62                              | 5.45                                        |
| $\text{S}(n=1^+)$               |                      | $10^{-15}$                           | $10^{-35}$                          | $10^{-26}$                         | $10^{-35}$                        | $10^{-32}$                                  |
| $\text{Ed}(n=1^-)$              |                      | 2.92                                 | 4.66                                | 2.80                               | 4.49                              | 4.47                                        |
| $\text{S}(n=1^-)$               |                      | $10^{11}$                            | $10^{-18}$                          | $10^{13}$                          | $10^{-16}$                        | $10^{-15}$                                  |

**Table S1** The dissociation energies (eV) for the  $\bullet\text{H}$  ( $E_d$ ) and the relative rates of H-O bond dissociation (S). The rate of  $\text{H}^+$  production in Table 1 is regarded as unit 1. The values of n, 0, 1<sup>+</sup> and 1<sup>-</sup> represent the neutral, losing electron and obtaining electron states of porphyrin and g-C<sub>3</sub>N<sub>4</sub>.

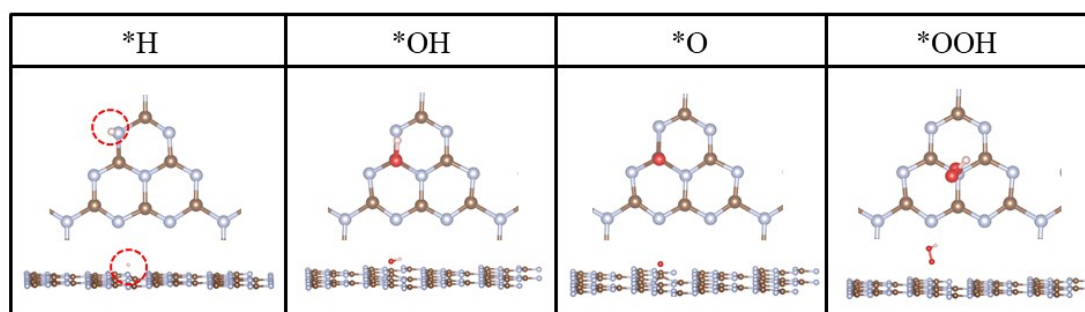

**Figure S11** Structures of the reaction intermediates for  $\text{H}_2$  (\*H) and  $\text{O}_2$  (\*OH, \*O and \*OOH) on pure g-C<sub>3</sub>N<sub>4</sub>.

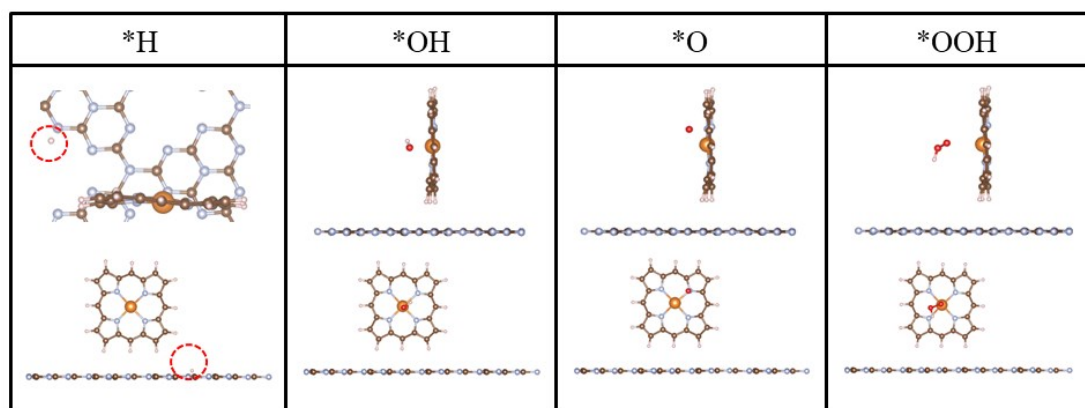

**Figure S12** Structures of the reaction intermediates for  $\text{H}_2$  (\*H) and  $\text{O}_2$  (\*OH, \*O and \*OOH) on Mg-por/g-C<sub>3</sub>N<sub>4</sub>.

1. Jiao, Y.; Zheng, Y.; Chen, P.; Jaroniec, M.; Qiao, S. Z., Molecular Scaffolding Strategy with Synergistic Active Centers to Facilitate Electrocatalytic  $\text{CO}_2$  Reduction to Hydrocarbon/Alcohol. *J. Am. Chem. Soc.* **2017**, *139*, 18093-18100.
2. Wang, V.; Xu, N.; Liu, J. C.; Tang, G.; Geng, W. T., Vaspkit: A Pre- and Post-Processing Program for Vasp Code. . *arXiv: Mater. Sci.* **2019**.
